# Supplementary material
Source: PubMed Central journal article supplement (PMC10777251)
Supplement: jama-e2323649-s002.pdf [file jama-e2323649-s002.pdf]

## Data Sharing Statement

Koukounas. Social Risk and Dialysis Facility Performance in the First Year of the ESRD Treatment Choices Model. *JAMA*. Published January 09, 2024. doi:10.1001/jama.2023.23649

### Data

**Data available:** No

### Additional Information

**Explanation for why data not available:** Data is publicly available already through the CMS ETC website.
